# Supplementary material
Source: publisher site journal article supplement (https://www.dovepress.com/article/340057)
Supplement: Supplementary file 1 [file get_supplementary_file.php]

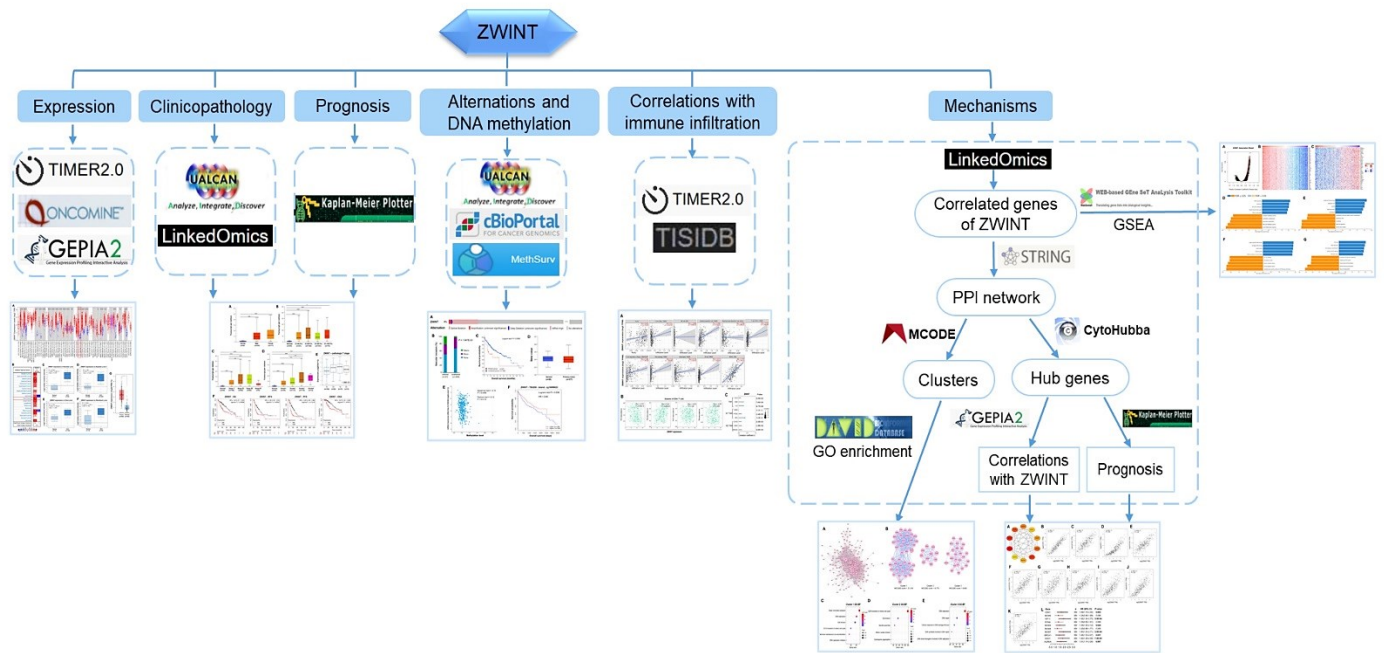

**Supplementary Figure 1** A workflow of this study. GSEA, gene set enrichment analysis; GO, gene ontology.

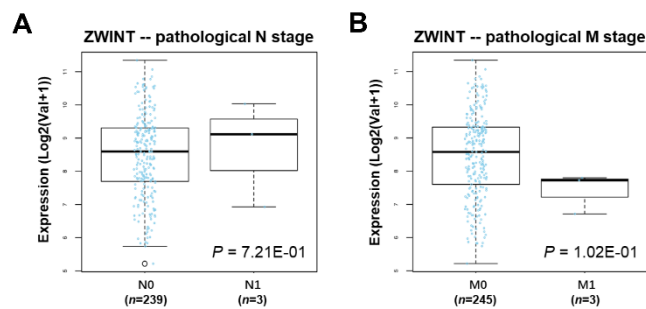

**Supplementary Figure 2** The expression of *ZWINT* in HCC patients with different pathological (A) N stages and (B) M stages (LinkedOmics).
